# Supplementary material for: Relationship between the Intake of n-3 Polyunsaturated Fatty Acids and Depressive Symptoms in Elderly Japanese People: Differences According to Sex and Weight Status
Source: Nutrients. 2019 Apr 3;11(4):775. doi: 10.3390/nu11040775 (PMC6521011; doi:10.3390/nu11040775)
Supplement: Supplementary file 1 [file nutrients-11-00775-s001.pdf]

**Supplementary Table.** Dietary sources of the n-3 PUFA intake.

| Dietary sources             | %    |
|-----------------------------|------|
| Grain                       | 1.79 |
| Potato                      | 0.06 |
| Pulse                       | 11.1 |
| Green and yellow vegetables | 0.50 |
| Other vegetables            | 1.44 |
| Fruits                      | 0.16 |
| Fish                        | 49.7 |
| Meats                       | 1.63 |
| Eggs                        | 2.13 |
| Milk                        | 0.38 |
| Oil                         | 19.1 |
| Sweets                      | 1.31 |
| Seasoning/Spices            | 10.7 |
